# Supplementary material for: High Expression of IRS-1, RUNX3 and SMAD4 Are Positive Prognostic Factors in Stage I–III Colon Cancer
Source: MDPI journal article supplement (doi:10.3390/cancers15051448), 2023-02-24
Supplement: s1 [file s1]

# Supplementary Materials: High Expression of IRS-1, RUNX3 and SMAD4 are Positive Prognostic Factors in Stage I-III colon cancer

Hallgeir Selven <sup>1,2</sup> , Lill-Tove Rasmussen Busund <sup>3,4</sup> , Sigve Andersen <sup>1,2</sup> , Mona Irene Pedersen <sup>2</sup>, Ana Paola Giometti Lombardi <sup>2</sup> and Thomas Karsten Kilvaer <sup>1,2,\*</sup> 

## 1. Supplementary Material

**Table S1.** HC Procedure Discovery Ultra.

| Baking           | Deparaff- inization          | Antigen retrieval | Primary Antibody       | Secondary Multimer              | Detection                   | Counterstain                 |
|------------------|------------------------------|-------------------|------------------------|---------------------------------|-----------------------------|------------------------------|
| Tissue 60°, 8min | Discovery wash 68°c, 3x12min | CC1 95°, 40min    | IRS-1 1:800 36°, 32min | OmniMap anti-Rb HRP 37C°, 16min | ChromoMap DAB/ 37C°, 8/4min | Hem II/Blueing 37C°, 24/8min |
| Tissue 60°, 8min | Discovery wash 68°, 3x12min  | CC1 95°, 40min    | IRS-2 1:200 36°, 32min | OmniMap anti-Rb HRP 37C°, 16min | ChromoMap DAB/ 37C°, 8/4min | Hem II/Blueing 37C°, 24/8min |
| Tissue 60°, 8min | Discovery wash 68°, 3x12min  | CC1 95°, 40min    | SMAD4 1:200 36°, 32min | OmniMap anti-Rb HRP 37C°, 16min | ChromoMap DAB/ 37C°, 8/4min | Hem II/Blueing 37C°, 24/8min |
| Tissue 60°, 8min | Discovery wash 68°, 3x12min  | CC1 95°, 40min    | RUNX3 1:400 36°, 32min | OmniMap anti-Ms HRP 37C°, 16min | ChromoMap DAB/ 37C°, 8/4min | Hem II/Blueing 37C°, 24/8min |

Abbreviations: CC1, cell conditioning 1; IRS, insulin receptor substrate; Rb, rabbit; DAB, Diaminobenzidine; RUNX,Runt-related transcription factor; Ms, mouse.

**Table S2.** Product information of antibodies and reagents.

| Reagent                                 | Reference          | Company                 |
|-----------------------------------------|--------------------|-------------------------|
| IRS-1, EP263Y Rb monoclonal             | Ab40077            | abcam                   |
| IRS-2, EPR904(2) Rb monoclonal          | Ab134101           | abcam                   |
| SMAD4, EP618Y Rb monoclonal             | Ab40759            | abcam                   |
| RUNX3, 2B3 Ms monoclonal                | Ab135248           | abcam                   |
| Discovery Wash                          | 7311079001         | Roche                   |
| Ultra LCS (Liquid cover slip)           | 5424534001         | Roche                   |
| Reaction buffer (Tris)                  | 5353955001         | Roche                   |
| Discovery CC1, Cell Conditioning (Tris) | 6414575001         | Roche                   |
| OmniMap anti-Ms HRP                     | 5269652001         | Roche                   |
| OmniMap anti-Rb HRP                     | 5269679001         | Roche                   |
| ChromoMap DAB kit                       | 5266645001         | Roche                   |
| Hematoxylin II                          | 5277965001         | Roche                   |
| Bluing reagent                          | 5266769001         | Roche                   |
| Ethanol 96%                             | 20823.362          | VWR, Avantor            |
| Etnanol absolute                        | 20821.296          | VWR, Avantor            |
| Xylene                                  | 28975.291          | VWR, Avantor            |
| Histokitt mounting medium               | Assistant 1025/250 | Sondheim/Rhoen, Germany |

Abbreviations: Abbreviations: CC1, cell conditioning 1; IRS, insulin receptor substrate; Rb, rabbit; DAB, Diaminobenzidine; RUNX, Runt-related transcription factor; Ms, mouse.

**Table S3.** Dichotomized IRS-1, IRS-2, SMAD4 and RUNX3 in tumor and stromal cell nucleus and/or cytoplasm and their distribution over and correlation with clinicopathological variables (chi-square and Fisher's exact tests).

|            | T-C-IRS-1 |     |       | T-C-IRS-2 |     |       | T-N-SMAD4 |     |       | T-C-SMAD4 |     |       | T-N-RUNX3 |     |       | T-C-RUNX3 |     |       | S-C-IRS-1 |     |        | S-C-IRS-2 |     |       | S-N-SMAD4 |     |       | S-C-SMAD4 |     |       | S-N-RUNX3 |     |       | S-C-RUNX3 |     |        |
|------------|-----------|-----|-------|-----------|-----|-------|-----------|-----|-------|-----------|-----|-------|-----------|-----|-------|-----------|-----|-------|-----------|-----|--------|-----------|-----|-------|-----------|-----|-------|-----------|-----|-------|-----------|-----|-------|-----------|-----|--------|
|            | L         | H   | p     | L         | H   | p     | L         | H   | p     | L         | H   | p     | L         | H   | p     | L         | H   | p     | L         | H   | p      | L         | H   | p     | L         | H   | p     | L         | H   | p     | L         | H   | p     | L         | H   | p      |
| Age        |           |     | 1.000 |           |     | 1.000 |           |     | 0.260 |           |     | 0.202 |           |     | 0.620 |           |     | 0.267 |           |     | 1.000  |           |     | 0.183 |           |     | 0.842 |           |     | 0.805 |           |     | 0.810 |           |     | 0.276  |
| < 65       | 53        | 52  |       | 50        | 49  |       | 31        | 72  |       | 30        | 73  |       | 31        | 73  |       | 21        | 83  |       | 22        | 83  |        | 56        | 43  |       | 53        | 50  |       | 36        | 67  |       | 65        | 39  |       | 31        | 73  |        |
| > 65       | 159       | 159 |       | 152       | 153 |       | 75        | 239 |       | 70        | 244 |       | 84        | 231 |       | 47        | 268 |       | 66        | 252 |        | 147       | 158 |       | 156       | 158 |       | 116       | 198 |       | 203       | 112 |       | 75        | 240 |        |
| Gender     |           |     | 0.304 |           |     | 0.485 |           |     | 0.579 |           |     | 0.464 |           |     | 0.908 |           |     | 0.628 |           |     | 0.862  |           |     | 0.545 |           |     | 0.256 |           |     | 0.742 |           |     | 0.548 |           |     | 0.706  |
| Female     | 108       | 119 |       | 104       | 112 |       | 55        | 173 |       | 51        | 177 |       | 61        | 165 |       | 39        | 187 |       | 46        | 181 |        | 105       | 111 |       | 108       | 120 |       | 81        | 147 |       | 148       | 78  |       | 55        | 171 |        |
| Male       | 104       | 92  |       | 98        | 90  |       | 51        | 138 |       | 49        | 140 |       | 54        | 139 |       | 29        | 164 |       | 42        | 154 |        | 98        | 90  |       | 101       | 88  |       | 71        | 118 |       | 120       | 73  |       | 51        | 142 |        |
| Weightloss |           |     | 0.213 |           |     | 0.049 |           |     | 0.092 |           |     | 0.031 |           |     | 0.176 |           |     | 0.078 |           |     | 0.158  |           |     | 0.013 |           |     | 0.556 |           |     | 0.151 |           |     | 0.684 |           |     | 0.151  |
| < 10%      | 106       | 122 |       | 99        | 119 |       | 50        | 174 |       | 47        | 177 |       | 58        | 168 |       | 29        | 197 |       | 41        | 187 |        | 97        | 121 |       | 107       | 117 |       | 76        | 148 |       | 139       | 87  |       | 50        | 176 |        |
| > 10%      | 49        | 40  |       | 50        | 35  |       | 29        | 61  |       | 30        | 60  |       | 30        | 58  |       | 19        | 69  |       | 23        | 66  |        | 52        | 33  |       | 47        | 43  |       | 39        | 51  |       | 57        | 31  |       | 27        | 61  |        |
| ECOG       |           |     | 0.147 |           |     | 0.989 |           |     | 0.285 |           |     | 0.094 |           |     | 0.968 |           |     | 0.833 |           |     | <0.001 |           |     | 0.472 |           |     | 0.418 |           |     | 0.121 |           |     | 0.524 |           |     | 0.141  |
| 0          | 107       | 115 |       | 109       | 107 |       | 50        | 166 |       | 43        | 173 |       | 59        | 159 |       | 35        | 183 |       | 33        | 189 |        | 110       | 106 |       | 102       | 114 |       | 69        | 147 |       | 140       | 78  |       | 48        | 170 |        |
| 1          | 70        | 69  |       | 63        | 66  |       | 37        | 101 |       | 37        | 101 |       | 39        | 100 |       | 22        | 117 |       | 31        | 108 |        | 60        | 69  |       | 71        | 67  |       | 55        | 83  |       | 85        | 54  |       | 38        | 101 |        |
| 2          | 28        | 22  |       | 25        | 25  |       | 15        | 37  |       | 15        | 37  |       | 15        | 35  |       | 9         | 41  |       | 20        | 30  |        | 29        | 21  |       | 27        | 25  |       | 22        | 30  |       | 33        | 17  |       | 16        | 34  |        |
| 3          | 7         | 1   |       | 3         | 3   |       | 4         | 4   |       | 4         | 4   |       | 2         | 6   |       | 2         | 6   |       | 4         | 4   |        | 2         | 4   |       | 6         | 2   |       | 5         | 3   |       | 7         | 1   |       | 4         | 4   |        |
| Site       |           |     | 0.553 |           |     | 0.164 |           |     | 0.142 |           |     | 0.163 |           |     | 0.005 |           |     | 0.004 |           |     | 0.609  |           |     | 0.704 |           |     | 0.020 |           |     | 0.163 |           |     | 0.001 |           |     | <0.001 |
| Sigm       | 106       | 108 |       | 89        | 110 |       | 45        | 166 |       | 41        | 170 |       | 47        | 164 |       | 23        | 188 |       | 40        | 174 |        | 94        | 105 |       | 94        | 117 |       | 67        | 144 |       | 119       | 92  |       | 41        | 170 |        |
| Transv     | 32        | 31  |       | 35        | 24  |       | 15        | 44  |       | 17        | 42  |       | 15        | 48  |       | 10        | 53  |       | 15        | 48  |        | 31        | 28  |       | 27        | 32  |       | 21        | 38  |       | 38        | 25  |       | 10        | 53  |        |
| Left       | 12        | 6   |       | 8         | 10  |       | 5         | 15  |       | 6         | 14  |       | 3         | 13  |       | 2         | 14  |       | 3         | 15  |        | 9         | 9   |       | 9         | 11  |       | 7         | 13  |       | 13        | 3   |       | 4         | 12  |        |
| Right      | 61        | 64  |       | 67        | 58  |       | 41        | 84  |       | 36        | 89  |       | 50        | 76  |       | 33        | 93  |       | 30        | 95  |        | 67        | 58  |       | 77        | 48  |       | 55        | 70  |       | 97        | 29  |       | 51        | 75  |        |
| pStage     |           |     | 0.073 |           |     | 0.129 |           |     | 0.141 |           |     | 0.024 |           |     | 0.132 |           |     | 0.456 |           |     | 0.266  |           |     | 0.226 |           |     | 0.369 |           |     | 0.012 |           |     | 0.079 |           |     | 0.002  |
| I          | 25        | 42  |       | 25        | 39  |       | 11        | 55  |       | 8         | 58  |       | 23        | 43  |       | 11        | 55  |       | 9         | 58  |        | 28        | 36  |       | 28        | 38  |       | 15        | 51  |       | 36        | 30  |       | 14        | 52  |        |
| II         | 110       | 100 |       | 100       | 98  |       | 52        | 153 |       | 49        | 156 |       | 48        | 158 |       | 29        | 177 |       | 46        | 164 |        | 96        | 102 |       | 104       | 101 |       | 73        | 132 |       | 129       | 77  |       | 40        | 166 |        |
| III        | 77        | 69  |       | 77        | 65  |       | 43        | 103 |       | 43        | 103 |       | 44        | 103 |       | 28        | 119 |       | 33        | 113 |        | 79        | 63  |       | 77        | 69  |       | 64        | 82  |       | 103       | 44  |       | 52        | 95  |        |
| Grade      |           |     | 0.894 |           |     | 0.234 |           |     | 0.108 |           |     | 0.280 |           |     | 0.131 |           |     | 0.146 |           |     | 0.199  |           |     | 0.127 |           |     | 0.003 |           |     | 0.088 |           |     | 0.019 |           |     | 0.116  |
| Well       | 16        | 16  |       | 17        | 15  |       | 12        | 20  |       | 10        | 22  |       | 13        | 18  |       | 4         | 27  |       | 5         | 27  |        | 18        | 14  |       | 20        | 12  |       | 14        | 18  |       | 25        | 6   |       | 9         | 22  |        |
| Mod        | 159       | 151 |       | 155       | 142 |       | 81        | 225 |       | 78        | 228 |       | 86        | 222 |       | 57        | 251 |       | 71        | 239 |        | 155       | 142 |       | 161       | 145 |       | 117       | 189 |       | 202       | 106 |       | 83        | 225 |        |
| Poor       | 32        | 38  |       | 25        | 40  |       | 12        | 57  |       | 12        | 57  |       | 15        | 54  |       | 6         | 63  |       | 9         | 61  |        | 24        | 41  |       | 24        | 45  |       | 18        | 51  |       | 35        | 34  |       | 11        | 58  |        |
| Und        | 2         | 2   |       | 2         | 2   |       | 0         | 4   |       | 0         | 4   |       | 0         | 4   |       | 1         | 3   |       | 1         | 3   |        | 2         | 2   |       | 0         | 4   |       | 0         | 4   |       | 3         | 1   |       | 2         | 2   |        |
| Vasc       |           |     | 1.000 |           |     | 0.880 |           |     | 1.000 |           |     | 0.762 |           |     | 0.520 |           |     | 1.000 |           |     | 0.516  |           |     | 0.743 |           |     | 0.174 |           |     | 0.263 |           |     | 0.381 |           |     | 1.000  |
| No         | 109       | 75  |       | 88        | 85  |       | 49        | 132 |       | 47        | 134 |       | 49        | 133 |       | 33        | 149 |       | 57        | 127 |        | 84        | 89  |       | 93        | 88  |       | 69        | 112 |       | 114       | 68  |       | 46        | 136 |        |
| Yes        | 7         | 5   |       | 9         | 7   |       | 4         | 10  |       | 4         | 10  |       | 2         | 11  |       | 2         | 11  |       | 2         | 10  |        | 9         | 7   |       | 10        | 4   |       | 8         | 6   |       | 10        | 3   |       | 3         | 10  |        |
| Margins    |           |     | 0.551 |           |     | 0.472 |           |     | 0.771 |           |     | 0.456 |           |     | 0.290 |           |     | 0.541 |           |     | 0.400  |           |     | 0.419 |           |     | 0.616 |           |     | 0.207 |           |     | 0.885 |           |     | 0.352  |
| 0mm        | 14        | 10  |       | 9         | 17  |       | 7         | 18  |       | 4         | 21  |       | 8         | 17  |       | 2         | 23  |       | 5         | 19  |        | 9         | 17  |       | 16        | 9   |       | 14        | 11  |       | 16        | 9   |       | 4         | 21  |        |
| < 1mm      | 17        | 24  |       | 22        | 17  |       | 11        | 29  |       | 10        | 30  |       | 16        | 25  |       | 10        | 31  |       | 7         | 34  |        | 22        | 17  |       | 23        | 17  |       | 18        | 22  |       | 28        | 13  |       | 13        | 28  |        |
| 1-2mm      | 15        | 18  |       | 15        | 15  |       | 10        | 22  |       | 10        | 22  |       | 9         | 22  |       | 4         | 27  |       | 7         | 26  |        | 17        | 13  |       | 15        | 17  |       | 10        | 22  |       | 18        | 13  |       | 4         | 27  |        |
| 2-10mm     | 58        | 53  |       | 50        | 61  |       | 27        | 86  |       | 26        | 87  |       | 26        | 84  |       | 17        | 93  |       | 18        | 93  |        | 51        | 60  |       | 54        | 59  |       | 36        | 77  |       | 67        | 43  |       | 29        | 81  |        |
| 10-50mm    | 81        | 66  |       | 72        | 64  |       | 41        | 102 |       | 41        | 102 |       | 34        | 110 |       | 21        | 123 |       | 40        | 107 |        | 69        | 67  |       | 69        | 74  |       | 55        | 88  |       | 96        | 48  |       | 40        | 104 |        |
| > 50mm     | 21        | 25  |       | 21        | 22  |       | 8         | 35  |       | 7         | 36  |       | 16        | 30  |       | 9         | 37  |       | 10        | 36  |        | 24        | 19  |       | 23        | 20  |       | 14        | 29  |       | 30        | 16  |       | 14        | 32  |        |

Abbreviations: T, tumor; C, cytoplasm; N, nucleus; S, stroma; L, low; H, high; ECOG, Eastern Cooperative Oncology Group.

**Table S4.** A) Univariate analyses of co-expression analyses between SMAD4 in tumor cytoplasm and RUNX3 in tumor nucleus (A1) and between SMAD4 in stromal cytoplasm and RUNX3 in and stromal cytoplasm (A2, log-rank test test, n = 452). B) Multivariable models including co-expressions of SMAD4 in tumor cytoplasm and RUNX3 in tumor nucleus (B1) and SMAD4 in stromal cytoplasm and RUNX3 in stromal cytoplasm (B2) and relevant clinicopathological variables (cox proportional hazards test, n = 452).

| A)             | A1<br>Tumor<br>N(%) | 5 Year | Median | HR(95%CI)       | P       | A2<br>Stroma<br>N(%) | 5 Year           | Median | HR(95%CI)       | P       |
|----------------|---------------------|--------|--------|-----------------|---------|----------------------|------------------|--------|-----------------|---------|
| SMAD4/RUNX3    |                     |        |        |                 | < 0.001 |                      |                  |        |                 | < 0.001 |
| SMAD4- /RUNX3- | 30(7)               | 57     | 70     | 1               |         | 70(15)               | 63               | 182    | 1               |         |
| SMAD4+ /RUNX3- | 35(8)               | 72     | NA     | 0.56(0.2-1.58)  |         | 32(7)                | 57               | NA     | 1.09(0.42-2.83) |         |
| SMAD4- /RUNX3+ | 65(14)              | 73     | NA     | 0.58(0.22-1.49) |         | 76(17)               | 79               | NA     | 0.47(0.24-0.94) |         |
| SMAD4+ /RUNX3+ | 272(60)             | 84     | NA     | 0.33(0.14-0.75) |         | 224(50)              | 88               | NA     | 0.29(0.16-0.51) |         |
| Missing        | 50(11)              |        |        |                 |         | 50(11)               |                  |        |                 |         |
| B)             | B1                  |        |        |                 |         | B2                   |                  |        |                 |         |
| SMAD4/RUNX3    |                     |        |        |                 |         |                      |                  |        |                 |         |
| SMAD4- /RUNX3- | 1                   |        |        |                 |         | 1                    |                  |        |                 |         |
| SMAD4+ /RUNX3- | 0.54(0.23-1.27)     |        |        |                 |         | 0.157                | 1.36(0.69-2.68)  |        |                 |         |
| SMAD4- /RUNX3+ | 0.65(0.31-1.35)     |        |        |                 |         | 0.243                | 0.5(0.27-0.93)   |        |                 |         |
| SMAD4+ /RUNX3+ | 0.34(0.18-0.66)     |        |        |                 |         | 0.001                | 0.34(0.2-0.57)   |        |                 |         |
| Age            | 1.03(1.01-1.05)     |        |        |                 |         | 0.004                | 1.03(1.01-1.05)  |        |                 |         |
| pTNM           |                     |        |        |                 |         |                      |                  |        |                 |         |
| I              | 1                   |        |        |                 |         |                      | 1                |        |                 |         |
| II             | 1.91(0.73-5)        |        |        |                 |         | 0.187                | 2.09(0.8-5.46)   |        |                 |         |
| III            | 5.28(2.07-13.44)    |        |        |                 |         | < 0.001              | 4.97(1.96-12.62) |        |                 |         |
| Margins        |                     |        |        |                 |         |                      |                  |        |                 |         |
| 0mm            | 1                   |        |        |                 |         |                      | 1                |        |                 |         |
| < 1mm          | 0.5(0.22-1.14)      |        |        |                 |         | 0.098                | 0.56(0.25-1.26)  |        |                 |         |
| 1-2mm          | 0.14(0.04-0.51)     |        |        |                 |         | 0.003                | 0.18(0.05-0.64)  |        |                 |         |
| 2-10mm         | 0.35(0.17-0.72)     |        |        |                 |         | 0.005                | 0.37(0.18-0.79)  |        |                 |         |
| 10-50mm        | 0.46(0.23-0.91)     |        |        |                 |         | 0.025                | 0.54(0.27-1.07)  |        |                 |         |
| > 50mm         | 0.34(0.13-0.88)     |        |        |                 |         | 0.026                | 0.35(0.13-0.9)   |        |                 |         |

Abbreviations: Abbreviations: CC1, cell conditioning 1; IRS, insulin receptor substrate; Rb, rabbit; DAB, Diaminobenzidine; RUNX, Runt-related transcription factor; Ms, mouse.

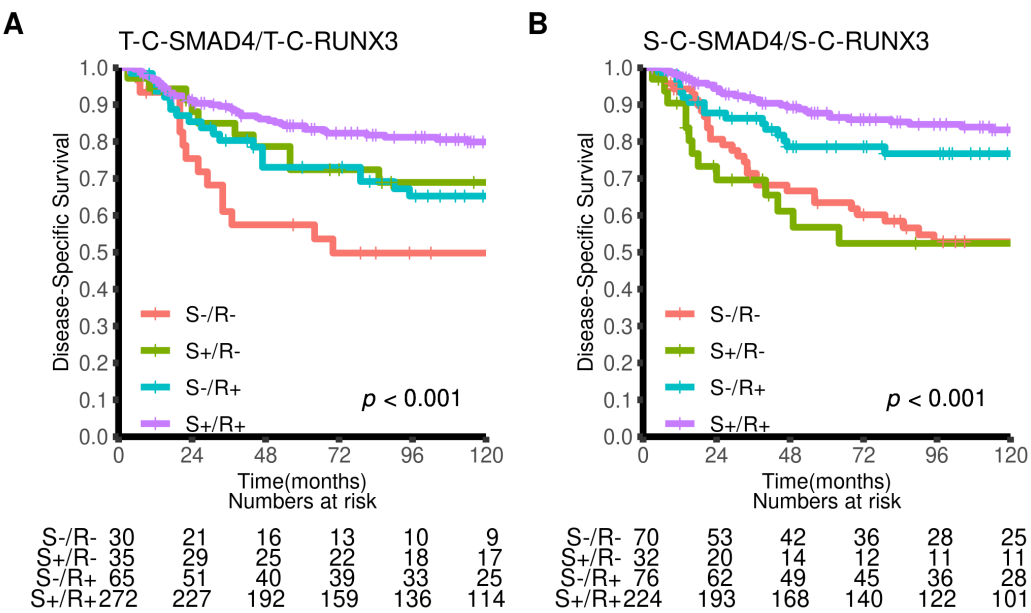

**Figure S1.** Disease-specific survival curves for the co-expressions between A) SMAD4 in tumor cytoplasm and RUNX3 in tumor nucleus and B) SMAD4 in stromal cytoplasm and RUNX3 in stromal cytoplasm.
